# Supplementary material for: Real‐World Associations of Renin–Angiotensin–Aldosterone System Inhibitor Dose, Hyperkalemia, and Adverse Clinical Outcomes in a Cohort of Patients With New‐Onset Chronic Kidney Disease or Heart Failure in the United Kingdom
Source: PubMed Central journal article supplement (PMC6915283; doi:10.1161/jaha.119.012655), 2019-11-12
Supplement: JAH3-8-e012655-s001.pdf [file JAH3-8-e012655-s001.pdf]

# **Supplemental Material**

## **Data S1.**

### **Supplementary Methods**

#### *Calculation of mean RAASi doses*

Each patient's follow-up time was divided into quarters, each consisting of 91.3125 days, and only patient-quarters spent on RAASi were included in the analysis, while intervals of discontinuation were omitted. Mean RAASi dose within each quarter (expressed as percentage of the ESC guideline-recommended dose) was calculated as the mean dose (also expressed as percentage of the ESC guideline-recommended dose for each therapy) across all therapies within each quarter, weighted by proportion of the quarter that the patient was on each therapy. Where a therapy was discontinued during a quarter, a dose of 0 was assumed for that therapy from the date of discontinuation to the end of the interval and included in the quarterly average. Specifically, we compared a patient's dosage within each quarter to the ESC 2016 guidelines<sup>1</sup>, as well as partly using each patient's history of RAASi therapy. If a patient had never been prescribed an MRA, it was assumed that MRA treatment was not required. Once a patient was prescribed an MRA, MRA treatment was assumed to be required from then on and treatment discontinuations were considered as described in the manuscript for all other RAASi therapies. The following summarises ESC guidelines on RAASi treatment, as used for the purpose of this analysis:

- ACE inhibitors are recommended in all symptomatic patients with HF with reduced left-ventricular ejection fraction (LVEF), unless contraindicated or not tolerated

- ARBs are recommended only as an alternative in patients intolerant of ACE inhibitors
- MRAs are recommended in all patients symptomatic despite treatment with an ACE inhibitor, who have heart failure with reduced LVEF and their LVEF is  $\leq 35\%$

In the absence of LVEF data, total target dose prior to initiation of MRA therapy was assumed to be 100% of an ACEi/ARB dose only (i.e. MRA was assumed not to be required). For all periods after initiation on MRA therapy, total target dose was assumed to be 100% of an ACEi/ARB dose + 100% of an MRA dose (i.e. MRA was assumed to be required from this point onwards). An example calculation of the total RAASi dose as a percentage of the guideline-recommended dose is presented in Figure S1. Note, that despite the ESC guidelines recommending ARBs as an alternative to ACE inhibitors in case of intolerance, patients receiving ACE inhibitors and ARBs concomitantly were not excluded from the analyses.

#### *Missing data: Multiple imputation methods*

Final estimates of adjusted incidence rate ratios (IRRs) and hazard ratios (HRs) were derived from five multiply imputed datasets, as illustrated in Figure S2. The model coefficients and their standard errors from each of the five imputed datasets were pooled to produce the final set of estimates using Rubin Rules, as described by Carpenter et al<sup>2</sup>. All missing baseline values of clinical variables (where patients did not have a measurement taken at index) were estimated using multiple imputation, with the last observation carried forward (LOCF) method then being applied for time periods between clinical measurements. The application of multiple imputation to

impute missing values in datasets derived from large clinical databases has been explored in other studies and has been shown to provide valid results<sup>3, 4</sup>.

Multiple imputation was performed by the method of Chained Equations<sup>5</sup> as implemented in R package mice<sup>6</sup> (Figure S3).

For this study, k=5 completed datasets were produced after performing i=50 iterations for the HF and CKD cohorts (this was sufficient to ensure convergence of the imputations).

The default method used by 'mice' for step (4) in the above algorithm is predictive mean matching (PMM); however, for this study linear regression predictions were used directly due to the low percentage of complete data for some variables. The multiple imputation models included the full set of candidate covariates from the analysis models that were subsequently fitted to the imputed datasets, plus each patient's total follow-up time and their observed number of events (deaths, major adverse cardiovascular events [MACE] and RAASi discontinuation) over the study follow-up period.

All clinical variables except serum potassium and estimated glomerular filtration rate (eGFR) were log transformed prior to fitting imputation models to enforce normality of their distributions. For these variables, a retransformation bias-correction factor was applied to the imputations after they were back-transformed to their original scale.

### *Sample size and patient attrition*

The study cohort was derived from all patients on the Clinical Practice Research Datalink (CPRD) (making use of linked Hospital Episode Statistics [HES] data) aged  $\geq 18$  years between 1 January 2006 and 31 December 2015. Patients not in receipt of renin-angiotensin-aldosterone system inhibitor (RAASi) therapies, defined as a composite of specific angiotensin-converting enzyme (ACE) inhibitors, angiotensin receptor blockers (ARBs) and mineralocorticoid receptor antagonists (MRAs) for which a recommended dose is provided by the European Society of Cardiology (ESC) 2016 Guidelines<sup>1</sup>, at any point over the duration of the follow-up period were included in some analyses for comparative purposes. Patients who received ESC-recommended RAASi therapy but had no adequate information on treatment dose available were also excluded. Guideline-recommended therapies included 4 ACE-Is (ramipril, lisinopril, enalapril maleate, captopril), 3 ARBs (candesartan cilexetil, losartan potassium and valsartan) and 2 MRAs (spironolactone and eplerenone). Specific inclusion and exclusion criteria for chronic kidney disease (CKD) and heart failure (HF) patients are listed in the manuscript. Table S8 provides details of sample size and patient attrition.

**Table S1. Proportion of missing data at baseline for continuous variables in the CKD and HF cohorts.**

| Variable                                                           | CKD cohort                                                  |                                          |                                          | HF cohort                                                   |                                         |                                         |
|--------------------------------------------------------------------|-------------------------------------------------------------|------------------------------------------|------------------------------------------|-------------------------------------------------------------|-----------------------------------------|-----------------------------------------|
|                                                                    | RAASi dose achieved during the majority (≥75%) of follow-up |                                          |                                          | RAASi dose achieved during the majority (≥75%) of follow-up |                                         |                                         |
|                                                                    | Non-RAASi (n=71,008)                                        | <50% of ESC-recommended dose (n=27,935)† | ≥50% of ESC-recommended dose (n=26,596)† | Non-RAASi (n=6,063)                                         | <50% of ESC-recommended dose (n=4,568)† | ≥50% of ESC-recommended dose (n=2,758)† |
| <b>Baseline* patient demographics and clinical characteristics</b> |                                                             |                                          |                                          |                                                             |                                         |                                         |
| BMI (kg/m <sup>2</sup> )                                           | 44,857 (63.16%)                                             | 13,504 (48.34%)                          | 11,164 (41.98%)                          | 5,361 (88.41%)                                              | 2,515 (55.06%)                          | 1,056 (38.29%)                          |
| SBP (mmHg)                                                         | 20,105 (28.31%)                                             | 1,812 (6.49%)                            | 850 (3.20%)                              | 4,262 (70.28%)                                              | 609 (13.33%)                            | 123 (4.46%)                             |
| DBP (mmHg)                                                         | 20,105 (28.31%)                                             | 1,812 (6.49%)                            | 850 (3.20%)                              | 4,262 (70.28%)                                              | 609 (13.33%)                            | 123 (4.46%)                             |
| eGFR (mL/min/1.73m <sup>2</sup> )                                  | 25,681 (36.16%)                                             | 11,398 (40.80%)                          | 9,746 (36.64%)                           | 5,558 (91.66%)                                              | 2,946 (64.49%)                          | 1,666 (60.41%)                          |
| Serum potassium (mEq/L)                                            | 11,427 (16.09%)                                             | 2,478 (8.87%)                            | 1,796 (6.75%)                            | 4,625 (76.27%)                                              | 909 (19.90%)                            | 310 (11.24%)                            |
| Serum phosphorus (mEq/L)                                           | 54,739 (77.08%)                                             | 22,127 (79.21%)                          | 21,583 (81.15%)                          | 5,744 (94.72%)                                              | 3,869 (84.70%)                          | 2,330 (84.48%)                          |
| Total Cholesterol (mmol/L)                                         | 34,271 (48.26%)                                             | 8,964 (32.09%)                           | 6,302 (23.70%)                           | 5,347 (88.18%)                                              | 2,383 (52.17%)                          | 896 (32.49%)                            |
| WBC                                                                | 22,206 (31.27%)                                             | 9,234 (33.06%)                           | 9,323 (35.05%)                           | 4,818 (79.45%)                                              | 1,744 (38.18%)                          | 961 (34.84%)                            |

BMI: body mass index; CKD: chronic kidney disease; DBP: diastolic blood pressure; eGFR: estimated glomerular filtration rate; HF: heart failure; RAASi: renin-angiotensin-aldosterone system inhibitors; SBP: systolic blood pressure; WBC: white blood cell count.

\*Baseline for RAASi patients is time of each patient's first RAASi prescription after their first CKD/HF event, for non-RAASi patients is time of first CKD/HF event. †The numbers of patients receiving <50% and ≥50% of the recommended dose do not add up to the total cohort size because patients who spent most of their time on 0% dose and those who do not have a clear majority of time spent at a given dose level are not shown in the Table but are included in the total cohort

**Table S2. Model output for dose modification of RAASi, stratified by serum K+ threshold for CKD cohort.**

| Explanatory variable                                                                       | Outcome         | OR     | 95% lower CI | 95% upper CI | P-value |
|--------------------------------------------------------------------------------------------|-----------------|--------|--------------|--------------|---------|
| <b>Incidence of down-titration or discontinuation: Hyperkalaemia threshold: 5.0 mmol/L</b> |                 |        |              |              |         |
| Serum potassium: $\geq 5.0$ mmol/L                                                         | Down-titration  | 1.7941 | 1.6449       | 1.9568       | <.0001  |
| Serum potassium: $\geq 5.0$ mmol/L                                                         | Discontinuation | 1.2707 | 1.1710       | 1.3790       | <.0001  |
| Drug type: ARB                                                                             | Down-titration  | 0.8142 | 0.6857       | 0.9667       | 0.0189  |
| Drug type: ARB                                                                             | Discontinuation | 1.0566 | 0.9324       | 1.1974       | 0.3874  |
| Drug type: MRA                                                                             | Down-titration  | 1.1947 | 1.0887       | 1.3110       | 0.0002  |
| Drug type: MRA                                                                             | Discontinuation | 0.6329 | 0.5772       | 0.6940       | <.0001  |
| Age (years)                                                                                | Down-titration  | 1.0074 | 1.0031       | 1.0118       | 0.0009  |
| Age (years)                                                                                | Discontinuation | 1.0042 | 1.0003       | 1.0082       | 0.0332  |
| Gender at baseline: Male                                                                   | Down-titration  | 1.1268 | 1.0370       | 1.2245       | 0.0049  |
| Gender at baseline: Male                                                                   | Discontinuation | 1.0573 | 0.9822       | 1.1381       | 0.1381  |
| Time from baseline (years)                                                                 | Down-titration  | 0.9954 | 0.9790       | 1.0121       | 0.5895  |
| Time from baseline (years)                                                                 | Discontinuation | 1.0036 | 0.9886       | 1.0189       | 0.643   |
| Time-updated eGFR: < 15 mL/min/1.73m <sup>2</sup>                                          | Down-titration  | 0.5506 | 0.2911       | 1.0415       | 0.0666  |
| Time-updated eGFR: < 15 mL/min/1.73m <sup>2</sup>                                          | Discontinuation | 1.6700 | 1.1067       | 2.5199       | 0.0146  |
| Time-updated eGFR: 30 to <45 mL/min/1.73m <sup>2</sup>                                     | Down-titration  | 0.5268 | 0.4402       | 0.6304       | <.0001  |
| Time-updated eGFR: 30 to <45 mL/min/1.73m <sup>2</sup>                                     | Discontinuation | 0.5178 | 0.4433       | 0.6049       | <.0001  |
| Time-updated eGFR: 45 to <60 mL/min/1.73m <sup>2</sup>                                     | Down-titration  | 0.5213 | 0.4488       | 0.6055       | <.0001  |
| Time-updated eGFR: 45 to <60 mL/min/1.73m <sup>2</sup>                                     | Discontinuation | 0.4976 | 0.4362       | 0.5676       | <.0001  |
| Time-updated eGFR: $\geq 60$ mL/min/1.73m <sup>2</sup>                                     | Down-titration  | 0.7130 | 0.6101       | 0.8332       | <.0001  |
| Time-updated eGFR: $\geq 60$ mL/min/1.73m <sup>2</sup>                                     | Discontinuation | 0.6516 | 0.5672       | 0.7486       | <.0001  |
| Time-updated blood pressure: Low                                                           | Down-titration  | 1.9265 | 1.7171       | 2.1614       | <.0001  |
| Time-updated blood pressure: Low                                                           | Discontinuation | 1.2531 | 1.1217       | 1.3998       | <.0001  |
| Time-updated blood pressure: Normal                                                        | Down-titration  | 1.3356 | 1.2190       | 1.4634       | <.0001  |
| Time-updated blood pressure: Normal                                                        | Discontinuation | 1.3454 | 1.2442       | 1.4549       | <.0001  |
| Time-updated blood pressure: Pre-High                                                      | Down-titration  | 5.6593 | 3.8225       | 8.3787       | <.0001  |
| Time-updated blood pressure: Pre-High                                                      | Discontinuation | 1.9398 | 1.1596       | 3.2450       | 0.0116  |
| Concomitant diuretics: Yes                                                                 | Down-titration  | 0.7996 | 0.1101       | 5.8051       | 0.8251  |
| Concomitant diuretics: Yes                                                                 | Discontinuation | 0.5597 | 0.0748       | 4.1901       | 0.572   |
| Concomitant NSAIDs: Yes                                                                    | Down-titration  | 0.0007 | 0.0004       | 0.0014       | <.0001  |
| Concomitant NSAIDs: Yes                                                                    | Discontinuation | 2.4010 | 0.2704       | 21.3177      | 0.4318  |
| Concomitant Betablockers: Yes                                                              | Down-titration  | 1.8414 | 0.5549       | 6.1106       | 0.3184  |
| Concomitant Betablockers: Yes                                                              | Discontinuation | 0.9140 | 0.2134       | 3.9158       | 0.9037  |
| Concomitant RAASi: Yes                                                                     | Down-titration  | 1.4096 | 1.2434       | 1.5980       | <.0001  |
| Concomitant RAASi: Yes                                                                     | Discontinuation | 3.0102 | 2.7026       | 3.3528       | <.0001  |
| <b>Incidence of down-titration or discontinuation: Hyperkalaemia threshold: 5.5 mmol/L</b> |                 |        |              |              |         |
| Serum potassium: $\geq 5.5$ mmol/L                                                         | Down-titration  | 2.9523 | 2.6222       | 3.3240       | <.0001  |
| Serum potassium: $\geq 5.5$ mmol/L                                                         | Discontinuation | 1.8004 | 1.5937       | 2.0338       | <.0001  |
| Drug type: ARB                                                                             | Down-titration  | 0.8082 | 0.6808       | 0.9593       | 0.0149  |
| Drug type: ARB                                                                             | Discontinuation | 1.0540 | 0.9301       | 1.1944       | 0.41    |
| Drug type: MRA                                                                             | Down-titration  | 1.1910 | 1.0851       | 1.3072       | 0.0002  |
| Drug type: MRA                                                                             | Discontinuation | 0.6332 | 0.5775       | 0.6943       | <.0001  |
| Age (years)                                                                                | Down-titration  | 1.0077 | 1.0034       | 1.0121       | 0.0005  |
| Age (years)                                                                                | Discontinuation | 1.0044 | 1.0005       | 1.0084       | 0.0266  |
| Gender at baseline: Male                                                                   | Down-titration  | 1.1277 | 1.0376       | 1.2257       | 0.0047  |
| Gender at baseline: Male                                                                   | Discontinuation | 1.0559 | 0.9809       | 1.1367       | 0.1485  |
| Time from baseline (years)                                                                 | Down-titration  | 0.9961 | 0.9795       | 1.0130       | 0.6481  |
| Time from baseline (years)                                                                 | Discontinuation | 1.0037 | 0.9887       | 1.0190       | 0.6358  |
| Time-updated eGFR: < 15 mL/min/1.73m <sup>2</sup>                                          | Down-titration  | 0.5002 | 0.2622       | 0.9542       | 0.0355  |
| Time-updated eGFR: < 15 mL/min/1.73m <sup>2</sup>                                          | Discontinuation | 1.5831 | 1.0383       | 2.4138       | 0.0328  |
| Time-updated eGFR: 30 to <45 mL/min/1.73m <sup>2</sup>                                     | Down-titration  | 0.5438 | 0.4535       | 0.6522       | <.0001  |
| Time-updated eGFR: 30 to <45 mL/min/1.73m <sup>2</sup>                                     | Discontinuation | 0.5325 | 0.4555       | 0.6226       | <.0001  |
| Time-updated eGFR: 45 to <60 mL/min/1.73m <sup>2</sup>                                     | Down-titration  | 0.5409 | 0.4642       | 0.6303       | <.0001  |
| Time-updated eGFR: 45 to <60 mL/min/1.73m <sup>2</sup>                                     | Discontinuation | 0.5114 | 0.4478       | 0.5841       | <.0001  |
| Time-updated eGFR: $\geq 60$ mL/min/1.73m <sup>2</sup>                                     | Down-titration  | 0.7370 | 0.6293       | 0.8631       | 0.0002  |

|                                                                                            |                 |        |        |         |        |
|--------------------------------------------------------------------------------------------|-----------------|--------|--------|---------|--------|
| Time-updated eGFR: $\geq 60$ mL/min/1.73m <sup>2</sup>                                     | Discontinuation | 0.6656 | 0.5788 | 0.7655  | <.0001 |
| Time-updated blood pressure: Low                                                           | Down-titration  | 1.9278 | 1.7180 | 2.1633  | <.0001 |
| Time-updated blood pressure: Low                                                           | Discontinuation | 1.2557 | 1.1239 | 1.4030  | <.0001 |
| Time-updated blood pressure: Normal                                                        | Down-titration  | 1.3324 | 1.2159 | 1.4601  | <.0001 |
| Time-updated blood pressure: Normal                                                        | Discontinuation | 1.3466 | 1.2453 | 1.4562  | <.0001 |
| Time-updated blood pressure: Pre-High                                                      | Down-titration  | 5.4882 | 3.6607 | 8.2279  | <.0001 |
| Time-updated blood pressure: Pre-High                                                      | Discontinuation | 1.9224 | 1.1524 | 3.2071  | 0.0123 |
| Concomitant diuretics: Yes                                                                 | Down-titration  | 0.7749 | 0.1056 | 5.6878  | 0.802  |
| Concomitant diuretics: Yes                                                                 | Discontinuation | 0.5306 | 0.0687 | 4.0987  | 0.5434 |
| Concomitant NSAIDs: Yes                                                                    | Down-titration  | 0.0007 | 0.0004 | 0.0013  | <.0001 |
| Concomitant NSAIDs: Yes                                                                    | Discontinuation | 2.3570 | 0.2798 | 19.8521 | 0.4303 |
| Concomitant Betablockers: Yes                                                              | Down-titration  | 2.0334 | 0.6458 | 6.4025  | 0.2253 |
| Concomitant Betablockers: Yes                                                              | Discontinuation | 0.9589 | 0.2238 | 4.1087  | 0.9549 |
| Concomitant RAASi: Yes                                                                     | Down-titration  | 1.3978 | 1.2325 | 1.5852  | <.0001 |
| Concomitant RAASi: Yes                                                                     | Discontinuation | 2.9892 | 2.6832 | 3.3301  | <.0001 |
| <b>Incidence of down-titration or discontinuation: Hyperkalaemia threshold: 6.0 mmol/L</b> |                 |        |        |         |        |
| Serum potassium: $\geq 6.0$ mmol/L                                                         | Down-titration  | 4.3185 | 3.5042 | 5.3219  | <.0001 |
| Serum potassium: $\geq 6.0$ mmol/L                                                         | Discontinuation | 2.8982 | 2.3343 | 3.5984  | <.0001 |
| Drug type: ARB                                                                             | Down-titration  | 0.8069 | 0.6802 | 0.9573  | 0.0139 |
| Drug type: ARB                                                                             | Discontinuation | 1.0536 | 0.9297 | 1.1939  | 0.4135 |
| Drug type: MRA                                                                             | Down-titration  | 1.1816 | 1.0766 | 1.2969  | 0.0004 |
| Drug type: MRA                                                                             | Discontinuation | 0.6316 | 0.5760 | 0.6925  | <.0001 |
| Age (years)                                                                                | Down-titration  | 1.0075 | 1.0032 | 1.0119  | 0.0007 |
| Age (years)                                                                                | Discontinuation | 1.0042 | 1.0003 | 1.0082  | 0.0323 |
| Gender at baseline: Male                                                                   | Down-titration  | 1.1405 | 1.0494 | 1.2396  | 0.002  |
| Gender at baseline: Male                                                                   | Discontinuation | 1.0591 | 0.9838 | 1.1401  | 0.1268 |
| Time from baseline (years)                                                                 | Down-titration  | 0.9989 | 0.9824 | 1.0157  | 0.8956 |
| Time from baseline (years)                                                                 | Discontinuation | 1.0048 | 0.9898 | 1.0201  | 0.5324 |
| Time-updated eGFR: $< 15$ mL/min/1.73m <sup>2</sup>                                        | Down-titration  | 0.4903 | 0.2546 | 0.9441  | 0.033  |
| Time-updated eGFR: $< 15$ mL/min/1.73m <sup>2</sup>                                        | Discontinuation | 1.5142 | 0.9844 | 2.3292  | 0.059  |
| Time-updated eGFR: 30 to $<45$ mL/min/1.73m <sup>2</sup>                                   | Down-titration  | 0.4866 | 0.4067 | 0.5821  | <.0001 |
| Time-updated eGFR: 30 to $<45$ mL/min/1.73m <sup>2</sup>                                   | Discontinuation | 0.5103 | 0.4372 | 0.5957  | <.0001 |
| Time-updated eGFR: 45 to $<60$ mL/min/1.73m <sup>2</sup>                                   | Down-titration  | 0.4981 | 0.4284 | 0.5791  | <.0001 |
| Time-updated eGFR: 45 to $<60$ mL/min/1.73m <sup>2</sup>                                   | Discontinuation | 0.4956 | 0.4346 | 0.5652  | <.0001 |
| Time-updated eGFR: $\geq 60$ mL/min/1.73m <sup>2</sup>                                     | Down-titration  | 0.7037 | 0.6013 | 0.8235  | <.0001 |
| Time-updated eGFR: $\geq 60$ mL/min/1.73m <sup>2</sup>                                     | Discontinuation | 0.6534 | 0.5686 | 0.7510  | <.0001 |
| Time-updated blood pressure: Low                                                           | Down-titration  | 1.9071 | 1.6995 | 2.1401  | <.0001 |
| Time-updated blood pressure: Low                                                           | Discontinuation | 1.2453 | 1.1143 | 1.3917  | 0.0001 |
| Time-updated blood pressure: Normal                                                        | Down-titration  | 1.3213 | 1.2062 | 1.4474  | <.0001 |
| Time-updated blood pressure: Normal                                                        | Discontinuation | 1.3408 | 1.2400 | 1.4499  | <.0001 |
| Time-updated blood pressure: Pre-High                                                      | Down-titration  | 5.7110 | 3.8741 | 8.4189  | <.0001 |
| Time-updated blood pressure: Pre-High                                                      | Discontinuation | 1.9494 | 1.1681 | 3.2532  | 0.0107 |
| Concomitant diuretics: Yes                                                                 | Down-titration  | 0.8136 | 0.1133 | 5.8443  | 0.8375 |
| Concomitant diuretics: Yes                                                                 | Discontinuation | 0.5725 | 0.0766 | 4.2787  | 0.5868 |
| Concomitant NSAIDs: Yes                                                                    | Down-titration  | 0.0006 | 0.0004 | 0.0012  | <.0001 |
| Concomitant NSAIDs: Yes                                                                    | Discontinuation | 2.1920 | 0.2835 | 16.9465 | 0.452  |
| Concomitant Betablockers: Yes                                                              | Down-titration  | 2.0168 | 0.6213 | 6.5461  | 0.2428 |
| Concomitant Betablockers: Yes                                                              | Discontinuation | 0.9622 | 0.2256 | 4.1037  | 0.9585 |
| Concomitant RAASi: Yes                                                                     | Down-titration  | 1.4384 | 1.2698 | 1.6293  | <.0001 |
| Concomitant RAASi: Yes                                                                     | Discontinuation | 3.0177 | 2.7104 | 3.3599  | <.0001 |

CI: confidence interval; eGFR: estimated glomerular filtration rate; HF: heart failure; MACE: major adverse cardiac event; OR: odds ratio; RAASi: renin-angiotensin-aldosterone system inhibitor; SE: standard error.

A one-unit change in explanatory variables increase the log odds of down-titration or discontinuation by the value of the corresponding estimate.



**Table S3. Model output for dose modification of RAASi, stratified by serum K+ threshold for HF cohort.**

| Explanatory variable                                                                       | Outcome         | OR     | 95% lower CI | 95% upper CI | P-value |
|--------------------------------------------------------------------------------------------|-----------------|--------|--------------|--------------|---------|
| <b>Incidence of down-titration or discontinuation: Hyperkalaemia threshold: 5.0 mmol/L</b> |                 |        |              |              |         |
| Serum potassium: $\geq 5.0$ mmol/L                                                         | Down-titration  | 1.3250 | 1.0832       | 1.6207       | 0.0062  |
| Serum potassium: $\geq 5.0$ mmol/L                                                         | Discontinuation | 1.1341 | 0.9163       | 1.4036       | 0.2479  |
| Drug type: ARB                                                                             | Down-titration  | 0.3855 | 0.3053       | 0.4869       | <.0001  |
| Drug type: ARB                                                                             | Discontinuation | 1.1037 | 0.9043       | 1.3472       | 0.3322  |
| Drug type: MRA                                                                             | Down-titration  | 1.1521 | 0.9369       | 1.4168       | 0.1795  |
| Drug type: MRA                                                                             | Discontinuation | 0.7204 | 0.5507       | 0.9423       | 0.0167  |
| Age (years)                                                                                | Down-titration  | 1.0088 | 1.0012       | 1.0166       | 0.022   |
| Age (years)                                                                                | Discontinuation | 1.0126 | 1.0045       | 1.0207       | 0.0025  |
| Gender at baseline: Male                                                                   | Down-titration  | 1.4118 | 1.1667       | 1.7085       | 0.0004  |
| Gender at baseline: Male                                                                   | Discontinuation | 1.0280 | 0.8473       | 1.2471       | 0.7794  |
| Time from baseline (years)                                                                 | Down-titration  | 0.8974 | 0.8501       | 0.9472       | <.0001  |
| Time from baseline (years)                                                                 | Discontinuation | 0.9251 | 0.8754       | 0.9777       | 0.0059  |
| Time-updated eGFR: < 15 mL/min/1.73m <sup>2</sup>                                          | Down-titration  | 3.1522 | 1.0667       | 9.3146       | 0.0378  |
| Time-updated eGFR: < 15 mL/min/1.73m <sup>2</sup>                                          | Discontinuation | 5.0576 | 1.7513       | 14.6063      | 0.0027  |
| Time-updated eGFR: 30 to <45 mL/min/1.73m <sup>2</sup>                                     | Down-titration  | 0.8873 | 0.5015       | 1.5698       | 0.6811  |
| Time-updated eGFR: 30 to <45 mL/min/1.73m <sup>2</sup>                                     | Discontinuation | 0.5572 | 0.3565       | 0.8708       | 0.0103  |
| Time-updated eGFR: 45 to <60 mL/min/1.73m <sup>2</sup>                                     | Down-titration  | 1.0342 | 0.5775       | 1.8521       | 0.9101  |
| Time-updated eGFR: 45 to <60 mL/min/1.73m <sup>2</sup>                                     | Discontinuation | 0.5726 | 0.3604       | 0.9098       | 0.0183  |
| Time-updated eGFR: $\geq 60$ mL/min/1.73m <sup>2</sup>                                     | Down-titration  | 1.0901 | 0.6087       | 1.9523       | 0.7716  |
| Time-updated eGFR: $\geq 60$ mL/min/1.73m <sup>2</sup>                                     | Discontinuation | 0.5606 | 0.3377       | 0.9304       | 0.0252  |
| Time-updated blood pressure: Low                                                           | Down-titration  | 1.5510 | 1.2625       | 1.9054       | <.0001  |
| Time-updated blood pressure: Low                                                           | Discontinuation | 1.0048 | 0.8123       | 1.2429       | 0.9649  |
| Time-updated blood pressure: Normal                                                        | Down-titration  | 1.0369 | 0.8278       | 1.2988       | 0.7529  |
| Time-updated blood pressure: Normal                                                        | Discontinuation | 1.0169 | 0.8216       | 1.2587       | 0.8773  |
| Time-updated blood pressure: Pre-High                                                      | Down-titration  | 3.3364 | 1.9145       | 5.8146       | <.0001  |
| Time-updated blood pressure: Pre-High                                                      | Discontinuation | 1.5633 | 0.7125       | 3.4300       | 0.2651  |
| Concomitant diuretics: Yes                                                                 | Down-titration  | 1.2880 | 0.9917       | 1.6729       | 0.0579  |
| Concomitant diuretics: Yes                                                                 | Discontinuation | 0.7465 | 0.5715       | 0.9751       | 0.0319  |
| Concomitant NSAIDs: Yes                                                                    | Down-titration  | 1.0712 | 0.7411       | 1.5485       | 0.7145  |
| Concomitant NSAIDs: Yes                                                                    | Discontinuation | 1.0520 | 0.7122       | 1.5539       | 0.7989  |
| Concomitant Betablockers: Yes                                                              | Down-titration  | 1.0592 | 0.8817       | 1.2725       | 0.5391  |
| Concomitant Betablockers: Yes                                                              | Discontinuation | 0.8557 | 0.7117       | 1.0288       | 0.0975  |
| Concomitant RAASi: Yes                                                                     | Down-titration  | 1.1522 | 0.9464       | 1.4028       | 0.1582  |
| Concomitant RAASi: Yes                                                                     | Discontinuation | 1.4110 | 1.1405       | 1.7457       | 0.0015  |
| <b>Incidence of down-titration or discontinuation: Hyperkalaemia threshold: 5.5 mmol/L</b> |                 |        |              |              |         |
| Serum potassium: $\geq 5.5$ mmol/L                                                         | Down-titration  | 1.9278 | 1.4125       | 2.6312       | <.0001  |
| Serum potassium: $\geq 5.5$ mmol/L                                                         | Discontinuation | 1.6960 | 1.2233       | 2.3514       | 0.0015  |
| Drug type: ARB                                                                             | Down-titration  | 0.3852 | 0.3049       | 0.4866       | <.0001  |
| Drug type: ARB                                                                             | Discontinuation | 1.1011 | 0.9021       | 1.3440       | 0.3435  |
| Drug type: MRA                                                                             | Down-titration  | 1.1563 | 0.9399       | 1.4224       | 0.1697  |
| Drug type: MRA                                                                             | Discontinuation | 0.7223 | 0.5521       | 0.9450       | 0.0176  |
| Age (years)                                                                                | Down-titration  | 1.0089 | 1.0013       | 1.0167       | 0.0217  |
| Age (years)                                                                                | Discontinuation | 1.0124 | 1.0041       | 1.0207       | 0.003   |
| Gender at baseline: Male                                                                   | Down-titration  | 1.4130 | 1.1676       | 1.7099       | 0.0004  |
| Gender at baseline: Male                                                                   | Discontinuation | 1.0273 | 0.8469       | 1.2460       | 0.785   |
| Time from baseline (years)                                                                 | Down-titration  | 0.8980 | 0.8509       | 0.9477       | <.0001  |
| Time from baseline (years)                                                                 | Discontinuation | 0.9249 | 0.8750       | 0.9776       | 0.0057  |
| Time-updated eGFR: < 15 mL/min/1.73m <sup>2</sup>                                          | Down-titration  | 3.0508 | 1.0614       | 8.7693       | 0.0384  |
| Time-updated eGFR: < 15 mL/min/1.73m <sup>2</sup>                                          | Discontinuation | 4.8235 | 1.6507       | 14.0949      | 0.004   |
| Time-updated eGFR: 30 to <45 mL/min/1.73m <sup>2</sup>                                     | Down-titration  | 0.8962 | 0.5024       | 1.5987       | 0.7105  |
| Time-updated eGFR: 30 to <45 mL/min/1.73m <sup>2</sup>                                     | Discontinuation | 0.5737 | 0.3679       | 0.8946       | 0.0142  |
| Time-updated eGFR: 45 to <60 mL/min/1.73m <sup>2</sup>                                     | Down-titration  | 1.0519 | 0.5829       | 1.8983       | 0.8664  |
| Time-updated eGFR: 45 to <60 mL/min/1.73m <sup>2</sup>                                     | Discontinuation | 0.5899 | 0.3718       | 0.9359       | 0.025   |
| Time-updated eGFR: $\geq 60$ mL/min/1.73m <sup>2</sup>                                     | Down-titration  | 1.0873 | 0.6025       | 1.9622       | 0.7811  |

|                                                                                            |                 |        |        |         |        |
|--------------------------------------------------------------------------------------------|-----------------|--------|--------|---------|--------|
| Time-updated eGFR: $\geq 60$ mL/min/1.73m <sup>2</sup>                                     | Discontinuation | 0.5623 | 0.3386 | 0.9336  | 0.026  |
| Time-updated blood pressure: Low                                                           | Down-titration  | 1.5583 | 1.2682 | 1.9148  | <.0001 |
| Time-updated blood pressure: Low                                                           | Discontinuation | 1.0144 | 0.8196 | 1.2555  | 0.8954 |
| Time-updated blood pressure: Normal                                                        | Down-titration  | 1.0371 | 0.8278 | 1.2993  | 0.7518 |
| Time-updated blood pressure: Normal                                                        | Discontinuation | 1.0209 | 0.8247 | 1.2638  | 0.8494 |
| Time-updated blood pressure: Pre-High                                                      | Down-titration  | 3.3923 | 1.9480 | 5.9072  | <.0001 |
| Time-updated blood pressure: Pre-High                                                      | Discontinuation | 1.5987 | 0.7304 | 3.4995  | 0.2404 |
| Concomitant diuretics: Yes                                                                 | Down-titration  | 1.2783 | 0.9845 | 1.6596  | 0.0653 |
| Concomitant diuretics: Yes                                                                 | Discontinuation | 0.7436 | 0.5691 | 0.9715  | 0.0298 |
| Concomitant NSAIDs: Yes                                                                    | Down-titration  | 1.0726 | 0.7438 | 1.5469  | 0.7076 |
| Concomitant NSAIDs: Yes                                                                    | Discontinuation | 1.0549 | 0.7149 | 1.5565  | 0.788  |
| Concomitant Betablockers: Yes                                                              | Down-titration  | 1.0648 | 0.8863 | 1.2792  | 0.5023 |
| Concomitant Betablockers: Yes                                                              | Discontinuation | 0.8575 | 0.7134 | 1.0308  | 0.1017 |
| Concomitant RAASi: Yes                                                                     | Down-titration  | 1.1530 | 0.9476 | 1.4030  | 0.1549 |
| Concomitant RAASi: Yes                                                                     | Discontinuation | 1.3972 | 1.1280 | 1.7307  | 0.0022 |
| <b>Incidence of down-titration or discontinuation: Hyperkalaemia threshold: 6.0 mmol/L</b> |                 |        |        |         |        |
| Serum potassium: $\geq 6.0$ mmol/L                                                         | Down-titration  | 3.1912 | 1.8593 | 5.4771  | <.0001 |
| Serum potassium: $\geq 6.0$ mmol/L                                                         | Discontinuation | 2.7357 | 1.5312 | 4.8879  | 0.0007 |
| Drug type: ARB                                                                             | Down-titration  | 0.3867 | 0.3060 | 0.4887  | <.0001 |
| Drug type: ARB                                                                             | Discontinuation | 1.1063 | 0.9062 | 1.3506  | 0.3213 |
| Drug type: MRA                                                                             | Down-titration  | 1.1589 | 0.9423 | 1.4254  | 0.1624 |
| Drug type: MRA                                                                             | Discontinuation | 0.7240 | 0.5535 | 0.9471  | 0.0185 |
| Age (years)                                                                                | Down-titration  | 1.0090 | 1.0016 | 1.0166  | 0.0186 |
| Age (years)                                                                                | Discontinuation | 1.0125 | 1.0044 | 1.0206  | 0.0026 |
| Gender at baseline: Male                                                                   | Down-titration  | 1.4152 | 1.1700 | 1.7119  | 0.0003 |
| Gender at baseline: Male                                                                   | Discontinuation | 1.0263 | 0.8461 | 1.2449  | 0.7915 |
| Time from baseline (years)                                                                 | Down-titration  | 0.9001 | 0.8531 | 0.9498  | 0.0001 |
| Time from baseline (years)                                                                 | Discontinuation | 0.9270 | 0.8772 | 0.9797  | 0.0072 |
| Time-updated eGFR: $< 15$ mL/min/1.73m <sup>2</sup>                                        | Down-titration  | 3.2333 | 1.1458 | 9.1242  | 0.0266 |
| Time-updated eGFR: $< 15$ mL/min/1.73m <sup>2</sup>                                        | Discontinuation | 5.2200 | 1.8454 | 14.7653 | 0.0018 |
| Time-updated eGFR: 30 to $<45$ mL/min/1.73m <sup>2</sup>                                   | Down-titration  | 0.8770 | 0.4941 | 1.5569  | 0.6541 |
| Time-updated eGFR: 30 to $<45$ mL/min/1.73m <sup>2</sup>                                   | Discontinuation | 0.5754 | 0.3677 | 0.9005  | 0.0156 |
| Time-updated eGFR: 45 to $<60$ mL/min/1.73m <sup>2</sup>                                   | Down-titration  | 1.0346 | 0.5757 | 1.8594  | 0.9095 |
| Time-updated eGFR: 45 to $<60$ mL/min/1.73m <sup>2</sup>                                   | Discontinuation | 0.5935 | 0.3733 | 0.9434  | 0.0274 |
| Time-updated eGFR: $\geq 60$ mL/min/1.73m <sup>2</sup>                                     | Down-titration  | 1.0819 | 0.6021 | 1.9440  | 0.7923 |
| Time-updated eGFR: $\geq 60$ mL/min/1.73m <sup>2</sup>                                     | Discontinuation | 0.5699 | 0.3431 | 0.9466  | 0.0299 |
| Time-updated blood pressure: Low                                                           | Down-titration  | 1.5597 | 1.2693 | 1.9165  | <.0001 |
| Time-updated blood pressure: Low                                                           | Discontinuation | 1.0134 | 0.8191 | 1.2538  | 0.9026 |
| Time-updated blood pressure: Normal                                                        | Down-titration  | 1.0394 | 0.8296 | 1.3021  | 0.7373 |
| Time-updated blood pressure: Normal                                                        | Discontinuation | 1.0248 | 0.8278 | 1.2686  | 0.8223 |
| Time-updated blood pressure: Pre-High                                                      | Down-titration  | 3.4264 | 1.9584 | 5.9947  | <.0001 |
| Time-updated blood pressure: Pre-High                                                      | Discontinuation | 1.6048 | 0.7317 | 3.5197  | 0.2378 |
| Concomitant diuretics: Yes                                                                 | Down-titration  | 1.2697 | 0.9782 | 1.6482  | 0.0728 |
| Concomitant diuretics: Yes                                                                 | Discontinuation | 0.7413 | 0.5675 | 0.9684  | 0.0282 |
| Concomitant NSAIDs: Yes                                                                    | Down-titration  | 1.0753 | 0.7450 | 1.5519  | 0.6979 |
| Concomitant NSAIDs: Yes                                                                    | Discontinuation | 1.0576 | 0.7167 | 1.5606  | 0.7779 |
| Concomitant Betablockers: Yes                                                              | Down-titration  | 1.0685 | 0.8896 | 1.2835  | 0.4787 |
| Concomitant Betablockers: Yes                                                              | Discontinuation | 0.8605 | 0.7159 | 1.0344  | 0.1097 |
| Concomitant RAASi: Yes                                                                     | Down-titration  | 1.1654 | 0.9578 | 1.4181  | 0.126  |
| Concomitant RAASi: Yes                                                                     | Discontinuation | 1.4055 | 1.1356 | 1.7396  | 0.0018 |

CI: confidence interval; eGFR: estimated glomerular filtration rate; HF: heart failure; MACE: major adverse cardiac event; OR: odds ratio; RAASi: renin-angiotensin-aldosterone system inhibitor; SE: standard error.

A one-unit change in explanatory variables increase the log odds of down-titration or discontinuation by the value of the corresponding estimate.

**Table S4. Model output for adverse outcomes stratified by RAASi dose within interval outcome occurred for the CKD cohort.**

| Explanatory variable                                         | IRR     | 95% lower CI | 95% upper CI | P-value |
|--------------------------------------------------------------|---------|--------------|--------------|---------|
| <b>Incidence of death</b>                                    |         |              |              |         |
| Mean RAASi dose in interval: <50%                            | 5.6013  | 5.2878       | 5.9333       | <0.0001 |
| Time-updated BMI (kg/m <sup>2</sup> )                        | 0.9847  | 0.9806       | 0.9889       | <0.0001 |
| Time-updated blood pressure: Low                             | 2.0211  | 1.6524       | 2.4722       | <0.0001 |
| Time-updated blood pressure: Pre-high                        | 0.6307  | 0.6013       | 0.6616       | <0.0001 |
| Time-updated blood pressure: High                            | 0.5256  | 0.4992       | 0.5533       | <0.0001 |
| Time-updated serum potassium (mmol/L)                        | 0.9763  | 0.9379       | 1.0163       | 0.2418  |
| Time-updated phosphorous (mmol/L)                            | 1.0039  | 0.9964       | 1.0114       | 0.3115  |
| Time-updated eGFR (mL/min/1.73m <sup>2</sup> )               | 0.9849  | 0.9831       | 0.9866       | <0.0001 |
| Time-updated cholesterol (mmol/L)                            | 0.7701  | 0.7539       | 0.7867       | <0.0001 |
| Time-updated WBC (x10 <sup>9</sup> /L)                       | 1.0949  | 1.0879       | 1.1019       | <0.0001 |
| Time-updated OADs usage: Yes                                 | 0.6545  | 0.6052       | 0.7079       | <0.0001 |
| Time-updated CCB usage: Yes                                  | 0.7337  | 0.6999       | 0.7691       | <0.0001 |
| Time-updated diuretic usage: Yes                             | 0.8486  | 0.8131       | 0.8858       | <0.0001 |
| Time-updated beta blockers usage: Yes                        | 0.7006  | 0.6692       | 0.7333       | <0.0001 |
| Time-updated statins usage: Yes                              | 0.3484  | 0.3328       | 0.3647       | <0.0001 |
| History of HF prior to interval: Yes                         | 1.8325  | 1.7172       | 1.9555       | <0.0001 |
| History of MACE prior to interval: Yes                       | 1.7810  | 1.7026       | 1.8630       | <0.0001 |
| History of PVD prior to interval: Yes                        | 1.5806  | 1.4627       | 1.7080       | <0.0001 |
| History of dementia prior to interval: Yes                   | 1.7772  | 1.6545       | 1.9090       | <0.0001 |
| History of diabetes (without chronic) prior to interval: Yes | 1.7260  | 1.6275       | 1.8304       | <0.0001 |
| History of cancer prior to interval: Yes                     | 1.9352  | 1.8512       | 2.0230       | <0.0001 |
| History of metatumour prior to interval: Yes                 | 1.8557  | 1.7191       | 2.0032       | <0.0001 |
| Age (years)                                                  | 1.0588  | 1.0560       | 1.0617       | <0.0001 |
| Smoker at baseline: Yes                                      | 1.4518  | 1.3722       | 1.5361       | <0.0001 |
| Time since baseline (days)                                   | 0.9999  | 0.9999       | 0.9999       | <0.0001 |
| <b>Incidence of MACE</b>                                     |         |              |              |         |
| Mean RAASi dose in interval: <50%                            | 1.6039  | 1.5528       | 1.6568       | <0.0001 |
| Time-updated BMI (kg/m <sup>2</sup> )                        | 0.9984  | 0.9953       | 1.0015       | 0.2986  |
| Time-updated blood pressure: Low                             | 1.2004  | 1.0083       | 1.4292       | 0.0401  |
| Time-updated blood pressure: Pre-high                        | 0.8816  | 0.8482       | 0.9162       | <0.0001 |
| Time-updated blood pressure: High                            | 0.9547  | 0.9159       | 0.9951       | 0.0285  |
| Time-updated serum potassium (mmol/L)                        | 0.8977  | 0.8726       | 0.9235       | <0.0001 |
| Time updated cholesterol (mmol/L)                            | 0.9924  | 0.9771       | 1.0079       | 0.3327  |
| Time-updated WBC (x10 <sup>9</sup> /L)                       | 1.0307  | 1.0246       | 1.0370       | <0.0001 |
| Time-updated diuretic use: Yes                               | 1.1718  | 1.1309       | 1.2141       | <0.0001 |
| Time-updated beta blockers use: Yes                          | 2.0226  | 1.9486       | 2.0994       | <0.0001 |
| Time-updated statins usage: Yes                              | 1.2579  | 1.2101       | 1.3076       | <0.0001 |
| Time-updated bronchodilators usage: Yes                      | 1.2741  | 1.2212       | 1.3293       | <0.0001 |
| History of HF prior to interval: Yes                         | 12.4495 | 11.6996      | 13.2475      | <0.0001 |
| History of MACE prior to interval: Yes (one quarter lagged)  | 0.5394  | 0.5068       | 0.5742       | <0.0001 |
| Age (years)                                                  | 1.0328  | 1.0307       | 1.0349       | <0.0001 |
| Gender at baseline (Male)                                    | 1.1619  | 1.1215       | 1.2038       | <0.0001 |
| Time since baseline (days)                                   | 0.9998  | 0.9998       | 0.9998       | <0.0001 |

BMI: body mass index; CI: confidence interval; eGFR: estimated glomerular filtration rate; HF: heart failure; IRR: incident rate ratios; MACE: major adverse cardiac event; RAASi: renin-angiotensin-aldosterone system inhibitor; SE: standard error.

A one-unit change in explanatory variables increased the expected incidence of death or MACE changes by the value of the corresponding estimate.

**Table S5. Model output for adverse outcomes stratified by RAASi dose within interval outcome occurred for the HF cohort.**

| Explanatory variable                                         | IRR    | 95% lower CI | 95% upper CI | P-value |
|--------------------------------------------------------------|--------|--------------|--------------|---------|
| <b>Incidence of death</b>                                    |        |              |              |         |
| Mean RAASi dose in interval: <50%                            | 7.3356 | 6.3463       | 8.4792       | <0.0001 |
| Time-updated BMI (kg/m <sup>2</sup> )                        | 0.9807 | 0.9732       | 0.9883       | <0.0001 |
| Time-updated blood pressure: Low                             | 2.0305 | 1.6685       | 2.4711       | <0.0001 |
| Time-updated blood pressure: Pre-high                        | 0.6533 | 0.6007       | 0.7106       | <0.0001 |
| Time-updated blood pressure: High                            | 0.5727 | 0.5180       | 0.6332       | <0.0001 |
| Time-updated phosphorous (mmol/L)                            | 1.2850 | 1.1512       | 1.4344       | <0.0001 |
| Time-updated serum potassium(mmol/L)                         | 0.8546 | 0.7918       | 0.9224       | 0.0001  |
| Time-updated eGFR (mL/min/1.73m <sup>2</sup> )               | 0.9894 | 0.9870       | 0.9918       | <0.0001 |
| Time-updated cholesterol (mmol/L)                            | 0.8017 | 0.7695       | 0.8352       | <0.0001 |
| Time-updated WBC (x10 <sup>9</sup> /L)                       | 1.0793 | 1.0641       | 1.0947       | <0.0001 |
| Time-updated CCB use: Yes                                    | 0.6687 | 0.5778       | 0.7740       | <0.0001 |
| Time-updated diuretic use: Yes                               | 0.6687 | 0.6132       | 0.7292       | <0.0001 |
| Time-updated beta blockers use: Yes                          | 0.5238 | 0.4813       | 0.5699       | <0.0001 |
| Time-updated statins use: Yes                                | 0.4077 | 0.3726       | 0.4460       | <0.0001 |
| History of MACE prior to interval: Yes                       | 1.2100 | 1.1129       | 1.3156       | <0.0001 |
| History of PVD prior to interval: Yes                        | 1.4277 | 1.2285       | 1.6591       | <0.0001 |
| History of dementia prior to interval: Yes                   | 1.3870 | 1.1860       | 1.6220       | <0.0001 |
| History of diabetes (without chronic) prior to interval: Yes | 1.3673 | 1.2346       | 1.5143       | <0.0001 |
| History of cancer prior to interval: Yes                     | 1.4619 | 1.3310       | 1.6057       | <0.0001 |
| History of metatumour prior to interval: Yes                 | 1.6344 | 1.3650       | 1.9570       | <0.0001 |
| Age (years)                                                  | 1.0376 | 1.0328       | 1.0424       | <0.0001 |
| Gender at baseline: Male                                     | 1.1232 | 1.0318       | 1.2226       | 0.0073  |
| Smoker at baseline: Yes                                      | 1.1287 | 1.0094       | 1.2621       | 0.0337  |
| Time since baseline (days)                                   | 0.9998 | 0.9998       | 0.9999       | <0.0001 |
| <b>Incidence of MACE</b>                                     |        |              |              |         |
| Mean RAASi dose in interval: <50%                            | 1.8471 | 1.7132       | 1.9914       | <0.0001 |
| Time-updated BMI (kg/m <sup>2</sup> )                        | 0.9920 | 0.9862       | 0.9977       | 0.0061  |
| Time-updated serum potassium (mmol/L)                        | 0.8077 | 0.7560       | 0.8629       | <0.0001 |
| Time updated eGFR (mL/min/1.73m <sup>2</sup> )               | 0.9953 | 0.9931       | 0.9975       | <0.0001 |
| Age (years)                                                  | 1.0070 | 1.0036       | 1.0103       | <0.0001 |
| Time since baseline (days)                                   | 0.9994 | 0.9993       | 0.9995       | <0.0001 |

BMI: body mass index; CCB: calcium channel blockers; CI: confidence interval; eGFR: estimated glomerular filtration rate; HF: heart failure; IRR: incident rate ratios; MACE: major adverse cardiac event; RAASi: renin-angiotensin-aldosterone system inhibitor; SE: standard error; WBC: white blood cell.

A one-unit change in explanatory variables increased the expected incidence of death or MACE changes by the value of the corresponding estimate.

**Table S6. Model output for survival analysis of adverse outcomes stratified by majority RAASi dose over the follow up for CKD cohort.**

| Explanatory variable              | HR     | 95% lower CI | 95% upper CI | P-value |
|-----------------------------------|--------|--------------|--------------|---------|
| <b>Death</b>                      |        |              |              |         |
| Mean RAASi dose in interval: <50% | 1.2074 | 1.1737       | 1.2421       | <0.0001 |
| Mean RAASi dose in interval: ≥50% | 0.6829 | 0.6599       | 0.7068       | <0.0001 |
| Baseline age (years)              | 1.0942 | 1.0926       | 1.0957       | <0.0001 |
| Gender at baseline: Male          | 1.3616 | 1.3292       | 1.3947       | <0.0001 |
| Baseline smoker: Yes              | 1.7042 | 1.6475       | 1.7629       | <0.0001 |
| Baseline BMI (kg/m <sup>2</sup> ) | 0.9827 | 0.9803       | 0.9852       | <0.0001 |
| History of diabetes               | 1.4735 | 1.4248       | 1.5238       | <0.0001 |
| <b>MACE</b>                       |        |              |              |         |
| Mean RAASi dose in interval: <50% | 2.2846 | 2.2175       | 2.3538       | <0.0001 |
| Mean RAASi dose in interval: ≥50% | 1.6882 | 1.6330       | 1.7453       | <0.0001 |
| Baseline age (years)              | 1.0551 | 1.0536       | 1.0565       | <0.0001 |
| Gender at baseline: Male          | 1.3624 | 1.3282       | 1.3976       | <0.0001 |
| Baseline smoker: Yes              | 1.1438 | 1.1002       | 1.1891       | <0.0001 |
| Baseline BMI (kg/m <sup>2</sup> ) | 1.0045 | 1.0020       | 1.0070       | 0.0004  |
| History of diabetes               | 1.1251 | 1.0859       | 1.1657       | <0.0001 |

BMI: body mass index; CI: confidence interval; HR: hazard ratio; MACE: major adverse cardiac event; RAASi: renin-angiotensin-aldosterone system inhibitor; SE: standard error.

A one-unit change in explanatory variables increased the risk of death or MACE by the value of the corresponding hazard ratio.

**Table S7. Model output for survival analysis of adverse outcomes stratified by majority achieved RAASi dose over the follow up for HF cohort.**

| Explanatory variable              | HR     | 95% lower CI | 95% upper CI | P-value |
|-----------------------------------|--------|--------------|--------------|---------|
| <b>Death</b>                      |        |              |              |         |
| Mean RAASi dose in interval: <50% | 1.0856 | 1.0180       | 1.1577       | 0.0122  |
| Mean RAASi dose in interval: ≥50% | 0.5021 | 0.4568       | 0.5517       | <0.0001 |
| Baseline age (years)              | 1.0618 | 1.0584       | 1.0652       | <0.0001 |
| Gender at baseline: Male          | 1.1285 | 1.0618       | 1.1994       | 0.0001  |
| Baseline smoker: Yes              | 1.6205 | 1.4903       | 1.7622       | <0.0001 |
| Baseline BMI (kg/m <sup>2</sup> ) | 0.9908 | 0.9855       | 0.9962       | 0.0008  |
| History of diabetes               | 1.1875 | 1.0901       | 1.2935       | 0.0001  |
| <b>MACE</b>                       |        |              |              |         |
| Mean RAASi dose in interval: <50% | 3.7225 | 3.4179       | 4.0542       | <0.0001 |
| Mean RAASi dose in interval: ≥50% | 3.1694 | 2.8766       | 3.4920       | <0.0001 |
| Baseline age (years)              | 1.0175 | 1.0147       | 1.0202       | <0.0001 |
| Gender at baseline: Male          | 1.1127 | 1.0448       | 1.1850       | 0.0009  |
| Baseline smoker: Yes              | 1.0787 | 0.9930       | 1.1718       | 0.0730  |
| Baseline BMI (kg/m <sup>2</sup> ) | 1.0066 | 1.0016       | 1.0117       | 0.0102  |
| History of diabetes               | 1.0345 | 0.9510       | 1.1253       | 0.4296  |

BMI: body mass index; CI: confidence interval; HR: hazard ratio; MACE: major adverse cardiac event; RAASi: renin-angiotensin-aldosterone system inhibitor; SE: standard error.

A one-unit change in explanatory variables increased the risk of death or MACE by the value of the corresponding hazard ratio.

**Table S8. Summary of sample size and patient attrition.**

| Population                                                                                                                  | CKD cohort     |               | HF cohort     |               |
|-----------------------------------------------------------------------------------------------------------------------------|----------------|---------------|---------------|---------------|
|                                                                                                                             | N              | %             | N             | %             |
| Patients meeting CKD/HF-specific inclusion criteria identified in the CPRD                                                  | 191,964        | 100.00%       | 21,334        | 100.00%       |
| Patients not in receipt of any RAASi therapy at any point over the follow-up period: <b>Final analysed Non-RAASi cohort</b> | <b>71,008</b>  | <b>36.99%</b> | <b>6,063</b>  | <b>28.42%</b> |
| Prescriptions for RAASi agents not recommended by ESC 2016 guidelines for treatment of HF                                   | -14,132        | -7.36%        | -996          | -4.67%        |
| RAASi prescriptions with missing/unusable dose information                                                                  | -6,252         | -3.26%        | -1,162        | -5.45%        |
| <b>Final analysed RAASi cohort</b>                                                                                          | <b>100,572</b> | <b>52.39%</b> | <b>13,113</b> | <b>61.47%</b> |

CPRD: Clinical Practice Research Datalink; CKD: chronic kidney disease; ESC: European Society of Cardiology; HF: heart failure; RAASi: Renin-Angiotensin-Aldosterone System Inhibitors

**Table S9. Baseline patient demographics, clinical characteristics and clinical histories of CKD and HF patients included in the analysis (RAASi) and patients excluded due to receiving RAASi agents for which a recommended dose was not specified by the European Society of Cardiology guidelines<sup>1</sup>, or due to missing/unusable RAASi dose information.**

| Variable                                                                        | CKD cohort           |                                              |                                | HF cohort           |                                             |                                |
|---------------------------------------------------------------------------------|----------------------|----------------------------------------------|--------------------------------|---------------------|---------------------------------------------|--------------------------------|
|                                                                                 | RAASi<br>(n=100,572) | Excluded patients <sup>†</sup><br>(n=20,384) | p-value<br>(ANOVA / $\chi^2$ ) | RAASi<br>(n=13,113) | Excluded patients <sup>†</sup><br>(n=2,157) | p-value<br>(ANOVA / $\chi^2$ ) |
| <b>Baseline* patient demographics and clinical characteristics, mean (SD)</b>   |                      |                                              |                                |                     |                                             |                                |
| Age (years)                                                                     | 73.59 (10.93)        | 73.21 (11.26)                                | <0.01 <sup>‡</sup>             | 72.88 (13.13)       | 73.55 (13.18)                               | 0.03 <sup>‡</sup>              |
| Female, n (%)                                                                   | 58,277 (57.95%)      | 11,758 (57.69%)                              | 0.49                           | 5,302 (40.43%)      | 933 (43.25%)                                | 0.01 <sup>‡</sup>              |
| Current Smoker, n (%)                                                           | 13,742 (13.66%)      | 2,739 (13.44%)                               | 0.40                           | 2,469 (18.83%)      | 391 (18.13%)                                | 0.46                           |
| BMI (kg/m <sup>2</sup> )                                                        | 28.91 (5.89)         | 29.00 (5.89)                                 | 0.28                           | 28.47 (6.73)        | 28.27 (6.65)                                | 0.53                           |
| SBP (mmHg)                                                                      | 141.97 (20.79)       | 140.68 (19.87)                               | <0.01 <sup>‡</sup>             | 129.34 (21.78)      | 129.49 (22.12)                              | 0.82                           |
| eGFR (mL/min/1.73m <sup>2</sup> )                                               | 50.85 (10.35)        | 4.48 (0.53)                                  | <0.01 <sup>‡</sup>             | 65.14 (17.35)       | 4.41 (0.55)                                 | <0.01 <sup>‡</sup>             |
| Serum potassium (mEq/L)                                                         | 4.51 (0.53)          | 50.70 (8.62)                                 | <0.01 <sup>‡</sup>             | 4.43 (0.54)         | 69.2 (15.01)                                | <0.01 <sup>‡</sup>             |
| Serum phosphorus (mEq/L)                                                        | 1.14 (1.03)          | 1.13 (0.22)                                  | 0.67                           | 1.15 (0.22)         | 1.15 (0.22)                                 | 0.99                           |
| <b>Clinical history within 5 years prior to initial CKD/HF diagnosis, n (%)</b> |                      |                                              |                                |                     |                                             |                                |
| Hx diabetes                                                                     | 18,898 (18.79%)      | 3,957 (19.41%)                               | 0.04 <sup>‡</sup>              | 2,122 (16.18%)      | 347 (16.09%)                                | 0.94                           |
| Hx MI                                                                           | 4,571 (4.55%)        | 834 (4.09%)                                  | <0.01 <sup>‡</sup>             | 1,543 (11.77%)      | 226 (10.48%)                                | 0.09                           |
| Hx PVD                                                                          | 2,994 (2.98%)        | 567 (2.78%)                                  | 0.14                           | 453 (3.45%)         | 62 (2.87%)                                  | 0.19                           |
| Hx stroke                                                                       | 6,410 (6.37%)        | 1,842 (9.04%)                                | <0.01 <sup>‡</sup>             | 871 (6.64%)         | 195 (9.04%)                                 | <0.01 <sup>‡</sup>             |
| Hx arrhythmia                                                                   | 8,769 (8.72%)        | 1,751 (8.59%)                                | 0.56                           | 3,192 (24.34%)      | 517 (23.97%)                                | 0.73                           |
| Hx CPD                                                                          | 10,240 (10.18%)      | 1,962 (9.63%)                                | 0.02 <sup>*</sup>              | 2,020 (15.40%)      | 319 (14.79%)                                | 0.48                           |
| Hx metastatic tumour                                                            | 2,209 (2.20%)        | 447 (2.19%)                                  | 1.00                           | 231 (1.76%)         | 35 (1.62%)                                  | 0.71                           |
| Hx rheumatic disease                                                            | 3,381 (3.36%)        | 689 (3.38%)                                  | 0.91                           | 374 (2.85%)         | 60 (2.78%)                                  | 0.91                           |
| Hx peptic ulcer                                                                 | 899 (0.89%)          | 182 (0.89%)                                  | <0.01 <sup>‡</sup>             | 146 (1.11%)         | 24 (1.11%)                                  | 1.00                           |
| Hx cancer                                                                       | 8,721 (8.67%)        | 1,863 (9.14%)                                | 0.03 <sup>‡</sup>              | 1,349 (10.29%)      | 230 (10.66%)                                | 0.62                           |
| <b>Baseline* medication usage, n (%)</b>                                        |                      |                                              |                                |                     |                                             |                                |
| Beta blockers                                                                   | 32,044 (31.86%)      | 5,979 (29.33%)                               | <0.01 <sup>‡</sup>             | 7,957 (60.68%)      | 1,113 (51.60%)                              | <0.01 <sup>‡</sup>             |
| Statins                                                                         | 56,138 (55.82%)      | 10,774 (52.86%)                              | <0.01 <sup>‡</sup>             | 7,200 (54.91%)      | 1,027 (47.61%)                              | <0.01 <sup>‡</sup>             |
| Bronchodilators                                                                 | 11,566 (11.50%)      | 2,352 (11.54%)                               | 0.89                           | 2,691 (20.52%)      | 431 (19.98%)                                | 0.58                           |
| Diuretics                                                                       | 49,721 (49.44%)      | 10,084 (49.47%)                              | 0.94                           | 10,449 (79.68%)     | 1,406 (65.18%)                              | <0.01 <sup>‡</sup>             |
| NSAIDs                                                                          | 9,439 (9.39%)        | 2,675 (13.12%)                               | <0.01 <sup>‡</sup>             | 643 (4.90%)         | 167 (7.74%)                                 | <0.01 <sup>‡</sup>             |
| Calcium channel blockers                                                        | 33,644 (33.45%)      | 6,938 (34.04%)                               | 0.11                           | 2,082 (15.88%)      | 459 (21.28%)                                | <0.01 <sup>‡</sup>             |
| OADs                                                                            | 13,316 (13.24%)      | 2,554 (12.53%)                               | <0.01 <sup>‡</sup>             | 1,515 (11.55%)      | 217 (10.06%)                                | 0.05 <sup>‡</sup>              |



|         |               |             |      |             |            |      |
|---------|---------------|-------------|------|-------------|------------|------|
| Insulin | 3,849 (3.83%) | 757 (3.71%) | 0.45 | 445 (3.39%) | 65 (3.01%) | 0.40 |
|---------|---------------|-------------|------|-------------|------------|------|

BMI: body mass index; CKD: chronic kidney disease; CPD: cardiopulmonary disease; eGFR: estimated glomerular filtration rate; ESC: European Society of Cardiology; HF: heart failure; Hx: History of; MI: myocardial infarction; NSAIDs: non-steroidal anti-inflammatory drugs; OADs: oral antidiabetics; RAASi: renin-angiotensin-aldosterone system inhibitors; SBP: systolic blood pressure; SD: standard deviation. ANOVA and Chi-squared test were used to evaluate differences between HbA1c groups for continuous and categorical variables, respectively. \*Baseline for RAASi patients is time of each patient's first RAASi prescription after their first CKD/HF event, for the excluded patients its time of first CKD/HF event. †Patients excluded due to to being in receipt of RAASi agents for which a recommended dose was not specified by European Society of Cardiology guidelines or due to missing/unusable RAASi dose information. ‡ Indicates significance at p <0.05

**Figure S1. Illustrative example of data structuring for estimating associations between renin-angiotensin-aldosterone system inhibitor dose and adverse clinical outcomes.**

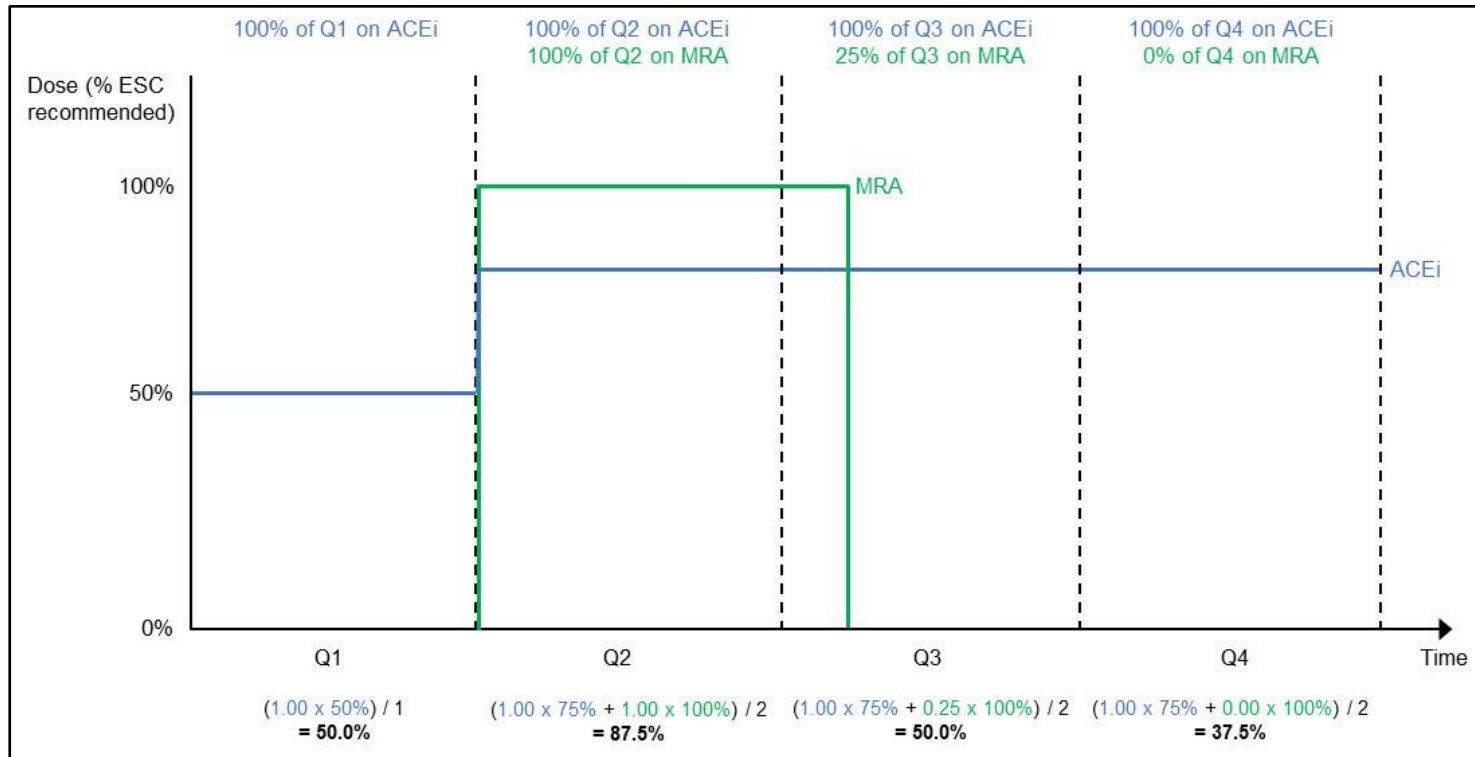

**Figure S2. Three stages of the multiple imputation process.**

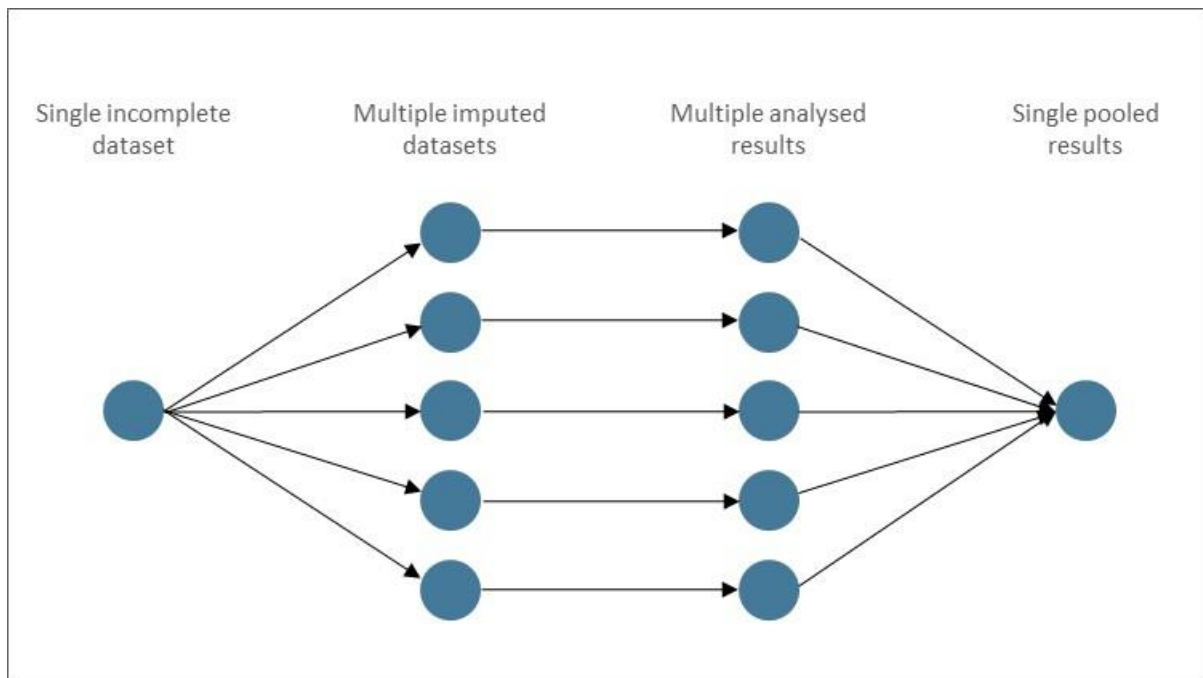

**Figure S3. Simple description of the Chained Equations algorithm.**

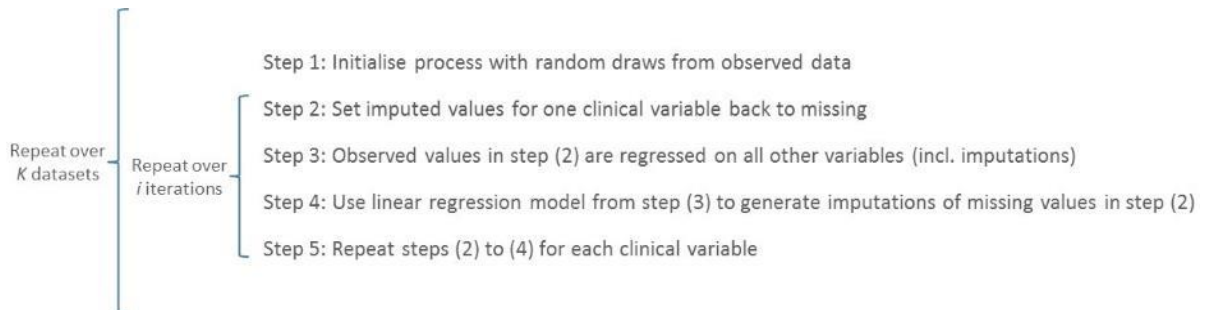

## Supplemental References:

1. Ponikowski P, Voors AA, Anker SD, Bueno H, Cleland JGF, Coats AJS, Falk V, Gonzalez-Juanatey JR, Harjola VP, Jankowska EA, Jessup M, Linde C, Nihoyannopoulos P, Parissis JT, Pieske B, Riley JP, Rosano GMC, Ruilope LM, Ruschitzka F, Rutten FH, van der Meer P, ESC Scientific Document Group. 2016 ESC guidelines for the diagnosis and treatment of acute and chronic heart failure: The task force for the diagnosis and treatment of acute and chronic heart failure of the European Society of Cardiology (ESC) developed with the special contribution of the Heart Failure Association (HFA) of the ESC. *Eur Heart J*. 2016;37:2129-2200.
2. Carpenter J, R., Kenward MG. *Missing data in randomised controlled trials: A practical guide*. Birmingham: Health Technology Assessment Methodology Programme; 2007.
3. Marston L, Carpenter JR, Walters KR, Morris RW, Nazareth I, Petersen I. Issues in multiple imputation of missing data for large general practice clinical databases. *Pharmacoepidemiol Drug Saf*. 2010;19:618-626.
4. Sterne JA, White IR, Carlin JB, Spratt M, Royston P, Kenward MG, Wood AM, Carpenter JR. Multiple imputation for missing data in epidemiological and clinical research: Potential and pitfalls. *BMJ (Clinical research ed.)*. 2009;338:b2393.
5. Azur MJ, Stuart EA, Frangakis C, Leaf PJ. Multiple imputation by chained equations: What is it and how does it work? *Int J Methods Psychiatr Res*. 2011;20:40-4.9
6. van Buuren S, Groothuis-Oudshoorn K. Mice: Multivariate imputation by chained equations in R. *J Stat Softw*. 2011;1.
